# Supplementary material
Source: publisher site journal article supplement (https://www.dovepress.com/article/341221)
Supplement: Supplementary file 1 [file get_supplementary_file.php]

**Supplementary materials**

**Supplementary table 1**: Healthcare utilization: Cost prices used (€)

| Cost category | Volume | Cost price (€, 2018)a |
| --- | --- | --- |
| Primary care |  |  |
| General practitioner | Visit | 34.00 |
| Physiotherapist | Visit | 34.00 |
| Hospital care |  |  |
| Emergency room | Visit | 269.00 |
| Ambulance | Transport | 536.00 |
| Outpatient medical services | Visit | 91.00 |
| Inpatient hospital care | Day | 495.00 |
| Long-term care |  |  |
| Nursing at home | Hour | 76.00 |
| Personal care at home | Hour | 52.00 |
| Domestic help at home | Hour | 22.50 |
| Daycare | Day | 134.00b |
| Inpatient care | Day | 168.00c |
| Informal care | Hour | 14.57 |

aDutch standard cost prices were used to value healthcare utilization.41 All prices were presented in 2018 Euros, and if necessary indexed to the reference year using a consumer price index.

bCost price for elderly daycare.

cCost price for inpatient elderly care.

**Supplementary table 2:** Estimated intervention costs (€)

| Cost category | *N* | Volume | Price/  Volumea | Costs | | |
| --- | --- | --- | --- | --- | --- | --- |
| Subtotal | Total | Per Participantb |
| Labor costs | 2 | 100 h | 33.97 | *–* | 6,794 | 51.08 |
| Training costs |  |  |  |  |  |  |
| Nurse | 23 | 20 hc | 30.95 | 14,237 |  |  |
| Nurse assistant | 34 | 20 hc | 22.18 | 15,082 |
| Nurse aide | 8 | 20 hc | 19.76 | 3,162 |
| Domestic worker | 89 | 16 hd | 19.14 | 27,255 |
| Total |  |  |  | *–* | 59,736 | 449.14 |
| Material costs |  |  |  |  |  |  |
| Program materials |  |  |  |  |  |  |
| Program trainer | 2 | 320 prints | 0.25 | 160 |  |  |
| Nurse | 23 | 120 prints | 0.25 | 690 |
| Nurse assistant | 34 | 120 prints | 0.25 | 1,020 |
| Nurse aide | 8 | 120 prints | 0.25 | 240 |
| Domestic worker | 89 | 40 prints | 0.25 | 890 |
| Total |  |  |  | *–* | 3,000 | 22.56 |
| Use of role models | 2 | 5 h | 20.66 | *–* | 207 | 1.56 |
| Use of professional actors | 3 | 10 h | 168.90 | *–* | 5,067 | 38.09 |
| Travel costs |  |  |  |  |  |  |
| Program trainer | 2 | 12.5 h | 33.97 | 849 |  |  |
| Nurse | 23 | 1.75 h | 30.95 | 1,246 |
| Nurse assistant | 34 | 1.75 h | 22.18 | 1,320 |
| Nurse aide | 8 | 1.75 h | 19.76 | 277 |
| Domestic worker | 89 | 1.25 h | 19.14 | 2,129 |
| Total |  |  |  | *–* | 5,821 | 43.77 |
| Accommodation costs | N/A | 50 meetings | 50.00e | *–* | 2,500 | 18.80 |
| Total intervention costs | | | | *–* | 83,125 | 625.00 |

aGross hourly wages are requested from the healthcare organization.

bCosts only relate to intervention group participants (*n* = 133).

cNurse, nurse assistants and nurse aides received 7 meetings, 6 practical assignments, and 20 weekly newsletters, with an average time investment of 9h, 6h, and 5h, respectively.

dDomestic workers received 5 meetings, 4 assignments, and 20 newsletters, with an average time investment of 7h, 4h and 5h, respectively.

eOnly a small price was charged for accommodation assuming meetings take place at the care site itself with little or no costs.

**Supplementary table 3**: Mean (SD) costs (€) of healthcare utilization per participant in the control and intervention group for the within-trial period (12 months) (observed estimates)

| Cost category | Control group (*n* = 99) | | | | |  | Intervention group (*n* = 101) | | | | |
| --- | --- | --- | --- | --- | --- | --- | --- | --- | --- | --- | --- |
| Mean | (SD) | Median | Min | Max |  | Mean | (SD) | Median | Min | Max |
| Intervention costs | 0 | (0) | 0 | 0 | 0 |  | 625 | (0) | 625 | 625 | 625 |
| Healthcare costs | 13,090 | 10,779 | 10,629 | 641 | 31,410 |  | 14,369 | 11,579 | 10,364 | 1,264 | 55,154 |
| Primary care |  |  |  |  |  |  |  |  |  |  |  |
| General practitioner | 257 | (296) | 170 | 0 | 1,870 |  | 305 | (466) | 170 | 0 | 3,638 |
| Physiotherapist | 834 | (1,162) | 68 | 0 | 5,304 |  | 1,002 | (1,221) | 629 | 0 | 5,168 |
| Hospital care |  |  |  |  |  |  |  |  |  |  |  |
| Emergency room | 92 | (237) | 0 | 0 | 1,614 |  | 117 | (233) | 0 | 0 | 1,345 |
| Ambulance | 168 | (388) | 0 | 0 | 2,144 |  | 191 | (483) | 0 | 0 | 3,216 |
| Outpatient hospital care | 278 | (320) | 182 | 0 | 1,456 |  | 425 | (885) | 182 | 0 | 8,281 |
| Inpatient hospital care | 1,370 | (3,821) | 0 | 0 | 23,265 |  | 2,318 | (5,652) | 0 | 0 | 38,115 |
| Long-term care |  |  |  |  |  |  |  |  |  |  |  |
| Nursing at home | 854 | (1,616) | 293 | 0 | 10,527 |  | 1,559 | (3,340) | 208 | 0 | 16,662 |
| Personal care at home | 5,465 | (5,149) | 3,976 | 0 | 28,933 |  | 4,629 | (4,278) | 3,285 | 0 | 21,535 |
| Domestic help at home | 1,488 | (1,597) | 1,350 | 0 | 5,940 |  | 1,780 | (1,672) | 1,575 | 0 | 7,003 |
| Daycare | 1,671 | (4,908) | 0 | 0 | 20,904 |  | 1,449 | (4,414) | 0 | 0 | 20,904 |
| Inpatient care | 630 | (2,453) | 0 | 0 | 15,120 |  | 595 | (2,835) | 0 | 0 | 26,040 |
| Patient and family costs | 4,651 | (5,506) | 2,683 | 0 | 31,410 |  | 4,696 | (6,946) | 1,705 | 0 | 30,621 |
| Total costs | 17,741 | (12,180) | 13,688 | 2189 | 63,953 |  | 19,691 | (14,778) | 14,703 | 1,889 | 67,598 |

**Note***.* Costs are expressed in 2018 Euros.

**Supplementary table 4**: Mean (SD) volumes of healthcare utilization per participant in the control and intervention group for the within-trial period (12 months) (observed estimates)

| Healthcare category (volume) | Control group (*n* = 99) | | | | |  | Intervention group (*n* = 101) | | | | | |
| --- | --- | --- | --- | --- | --- | --- | --- | --- | --- | --- | --- | --- |
| Mean | (SD) | Median | Min | Max |  | Mean | (SD) | Median | Min | Max |
| Primary care |  |  |  |  |  |  |  |  |  |  |  |
| General practitioner (visit) | 7.6 | (8.7) | 5.0 | 0.0 | 55.0 |  | 9.0 | (13.7) | 5.0 | 0.0 | 107.0 |
| Physiotherapist (visit) | 24.5 | (34.2) | 2.0 | 0.0 | 156.0 |  | 29.5 | (35.9) | 18.5 | 0.0 | 152.0 |
| Hospital care |  |  |  |  |  |  |  |  |  |  |  |
| Emergency room (visit) | 0.3 | (0.9) | 0.0 | 0.0 | 6.0 |  | 0.4 | (0.9) | 0.0 | 0.0 | 5.0 |
| Ambulance (transport) | 0.3 | (0.7) | 0.0 | 0.0 | 4.0 |  | 0.4 | (0.9) | 0.0 | 0.0 | 6.0 |
| Outpatient hospital care (visit) | 3.1 | (3.5) | 2.0 | 0.0 | 16.0 |  | 4.7 | (9.7) | 2.0 | 0.0 | 91.0 |
| Inpatient hospital care (day) | 2.8 | (7.7) | 0.0 | 0.0 | 47.0 |  | 4.7 | (11.4) | 0.0 | 0.0 | 77.0 |
| Long-term care |  |  |  |  |  |  |  |  |  |  |  |
| Nursing at home (hour) | 11.2 | (21.3) | 3.9 | 0.0 | 138.5 |  | 20.5 | (43.9) | 2.7 | 0.0 | 219.2 |
| Personal care at home (hour) | 105.1 | (99.0) | 76.5 | 0.0 | 556.4 |  | 89.0 | (82.3) | 63.2 | 0.0 | 414.1 |
| Domestic help at home (hour) | 66.2 | (71.0) | 60.0 | 0.0 | 264.0 |  | 79.1 | (74.3) | 70.0 | 0.0 | 311.3 |
| Daycare (day) | 12.5 | (36.6) | 0.0 | 0.0 | 156.0 |  | 10.8 | (32.9) | 0.0 | 0.0 | 156.0 |
| Inpatient care (day) | 3.7 | (14.6) | 0.0 | 0.0 | 90.0 |  | 3.5 | (16.9) | 0.0 | 0.0 | 155.0 |
| Informal care (hour) | 319.2 | (377.9) | 184.2 | 0.0 | 2155.8 |  | 322.3 | (476.8) | 117.0 | 0.0 | 2101.7 |

| Sensitivity analysis 1  (ITT – healthcare perspective) | Sensitivity analysis 2  (CC – societal perspective) | Sensitivity analysis 3  (no cost outliers – societal perspective) |
| --- | --- | --- |
| 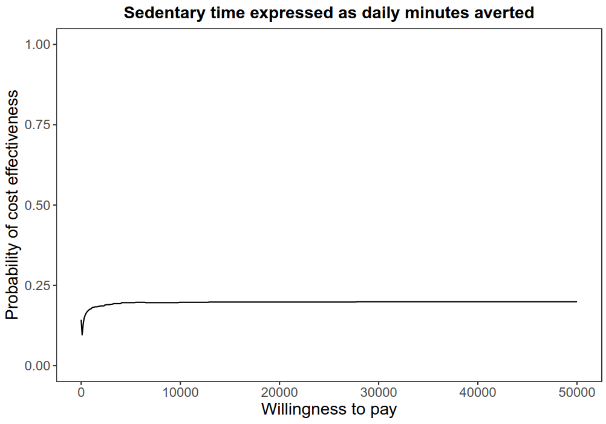 | 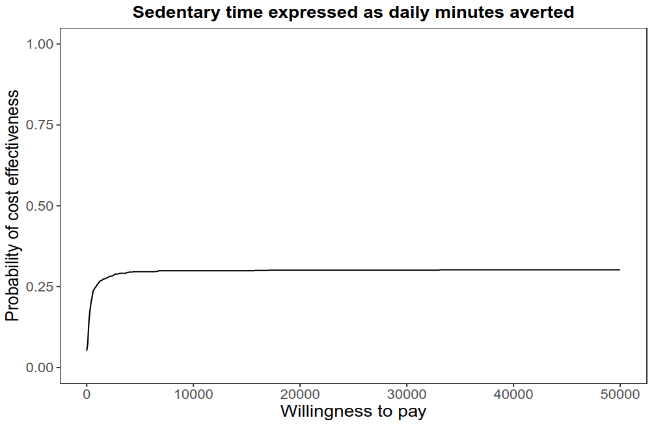 | 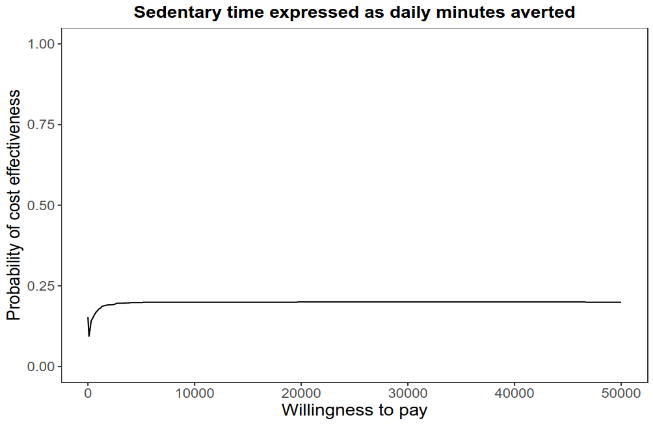 |
| 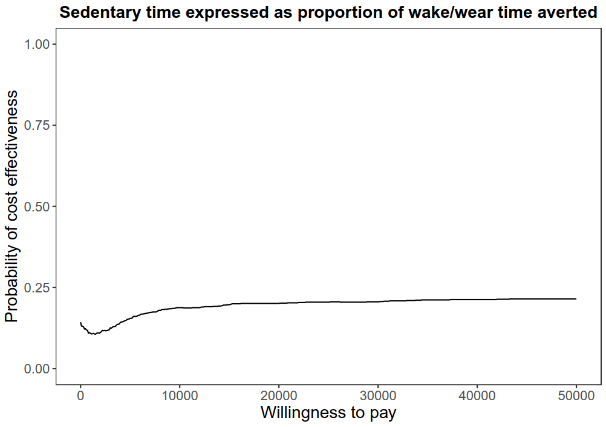 | 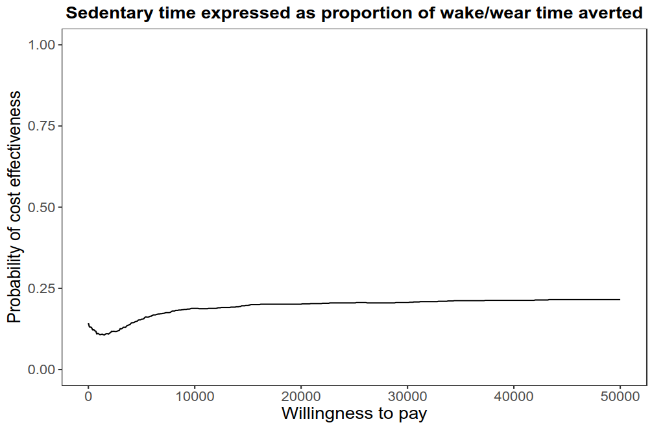 | 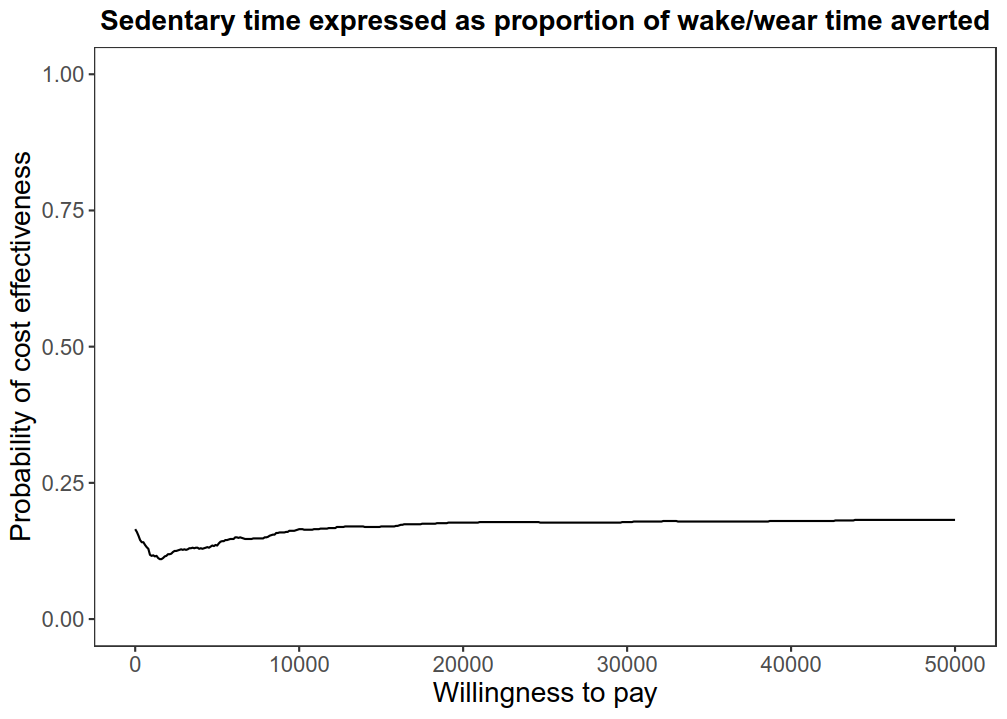 |
| 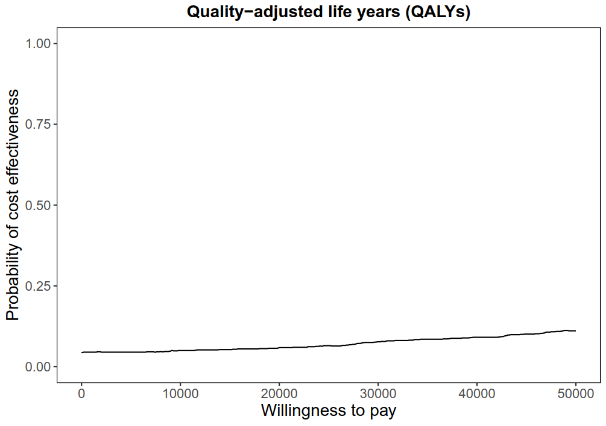 | 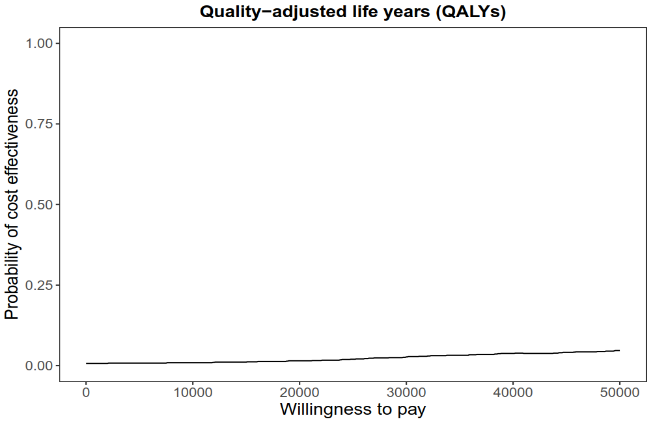 | 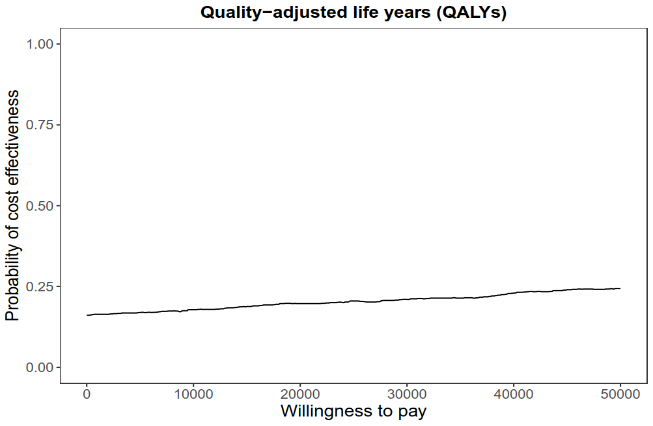 |

**Supplementary figure 1:** Cost-effectiveness acceptability curves for total societal costs and sedentary time expressed as daily minutes averted, sedentary time expressed as proportion of wake/wear time averted, and quality-adjusted life years (QALYs), respectively, for sensitivity analyses from the healthcare perspective, complete cases, and participants without extreme cost outliers. ITT, intention-to-treat; CC, complete cases
